# Supplementary material
Source: publisher figshare collection journal article supplement (https://karger.figshare.com/ndownloader/files/29093253)
Supplement: Supplementary file 1 [file 29093253]

**APPENDIX**

Appendix Fig. 1. Patterns of *cavitated decay* experience (ICDAS 3-6) by surface amongst 15-year-olds in England, Wales, and Northern Ireland, 2013 (n=2,160)

Appendix Fig. 2. Patterns of *extensive obvious decay* experience (ICDAS 5-6) by surface amongst 15-year-olds in England, Wales, and Northern Ireland, 2013 (n=2,160)

Appendix Table. Distribution of ICDAS code in clusters of different decay experience level among four diagnostic thresholds
